# Supplementary material for: Association between dietary patterns and prediabetes, undetected diabetes or clinically diagnosed diabetes: results from the KORA FF4 study
Source: PubMed Central journal article supplement (PMC8275503; doi:10.1007/s00394-020-02416-9), 2020-10-30
Supplement: 394_2020_2416_MOESM1_ESM.pdf [file 394_2020_2416_MOESM1_ESM.pdf]

## **Electronic supplementary material**

### **Association between dietary patterns and prediabetes, undetected diabetes or clinically diagnosed diabetes: results from the KORA FF4 study**

**Authors:** Giulia Pestoni<sup>1,2</sup>, Anna Riedl<sup>2,3</sup>, Taylor A. Breuninger<sup>2,3</sup>, Nina Wawro<sup>2,3</sup>, Jean-Philippe Krieger<sup>1</sup>, Christa Meisinger<sup>2,3</sup>, Wolfgang Rathmann<sup>4,5</sup>, Barbara Thorand<sup>5,6</sup>, Carla Harris<sup>6,7</sup>, Annette Peters<sup>5,6</sup>, Sabine Rohrmann<sup>1</sup>, Jakob Linseisen<sup>2,3</sup>

#### **Affiliations:**

<sup>1</sup>Division of Chronic Disease Epidemiology, Epidemiology, Biostatistics and Prevention Institute, University of Zurich, Zurich, Switzerland

<sup>2</sup>Independent Research Group Clinical Epidemiology, Helmholtz Zentrum München, German Research Center for Environmental Health, Neuherberg, Germany

<sup>3</sup>Ludwig-Maximilians-Universität München, Chair of Epidemiology, UNIKA-T Augsburg, Augsburg, Germany

<sup>4</sup>Institute for Biometrics and Epidemiology, German Diabetes Center, Leibniz Center for Diabetes Research at Heinrich Heine University Düsseldorf, Düsseldorf, Germany

<sup>5</sup>German Center for Diabetes Research (DZD e.V.), Neuherberg, Germany

<sup>6</sup>Institute of Epidemiology, Helmholtz Zentrum München, German Research Center for Environmental Health (GmbH), Neuherberg, Germany

<sup>7</sup>Division of Metabolic and Nutritional Medicine, Dr. von Hauner Children's Hospital, University of Munich Medical Center, Munich, Germany

#### **Corresponding author:**

Jakob Linseisen; Independent Research Group Clinical Epidemiology, Helmholtz Zentrum München, German Research Center for Environmental Health (GmbH), Ingolstädter Landstr. 1, 85764, Neuherberg, Germany; j.linseisen@helmholtz-muenchen.de; Tel. +49 89 3187-3202

**Table S1:** Characteristics of the participants with and without dietary information (after exclusions<sup>#</sup>)

|                                        | Participants with<br>dietary information<br>( <i>n</i> = 1305) | Participants without<br>dietary information<br>( <i>n</i> = 524) |
|----------------------------------------|----------------------------------------------------------------|------------------------------------------------------------------|
| Glucose tolerance status, <i>n</i> (%) |                                                                |                                                                  |
| Normal glucose tolerance               | 53.5                                                           | 50.4                                                             |
| Prediabetes                            | 35.2                                                           | 35.3                                                             |
| Undetected diabetes                    | 3.8                                                            | 4.4                                                              |
| Prevalent diabetes                     | 7.6                                                            | 9.9                                                              |
| Sex, <i>n</i> (%)                      |                                                                |                                                                  |
| Males                                  | 46.5                                                           | 49.0                                                             |
| Females                                | 53.5                                                           | 51.0                                                             |
| Age (years)                            | 58.4 ( 11.6 )                                                  | 59.6 ( 12.6 )                                                    |
| Marital status, <i>n</i> (%)           |                                                                |                                                                  |
| Single                                 | 9.1                                                            | 12.4                                                             |
| Married                                | 73.3                                                           | 67.9                                                             |
| Divorced                               | 10.7                                                           | 9.9                                                              |
| Widowed                                | 6.9                                                            | 9.7                                                              |
| Education, <i>n</i> (%)                |                                                                |                                                                  |
| < 10 years                             | 5.3                                                            | 9.8                                                              |
| 10-12 years                            | 56.9                                                           | 59.2                                                             |
| ≥ 13 years                             | 37.8                                                           | 31.0                                                             |
| BMI (kg/m <sup>2</sup> )               | 27.5 ( 4.9 )                                                   | 28.3 ( 5.2 )                                                     |
| Waist circumference (cm)               | 95.7 ( 14.3 )                                                  | 97.9 ( 13.8 )                                                    |
| Physical activity level, <i>n</i> (%)  |                                                                |                                                                  |
| Inactive                               | 37.9                                                           | 48.9                                                             |
| Active                                 | 62.1                                                           | 51.1                                                             |
| Smoking status, <i>n</i> (%)           |                                                                |                                                                  |
| Never                                  | 42.9                                                           | 41.8                                                             |
| Former                                 | 42.8                                                           | 38.2                                                             |
| Current                                | 14.3                                                           | 20.0                                                             |
| Hypertension, <i>n</i> (%)             |                                                                |                                                                  |
| No                                     | 64.5                                                           | 65.3                                                             |
| Yes                                    | 35.5                                                           | 34.7                                                             |

Continuous variables are expressed as mean (SD); categorical variables are expressed as *n* (%)

# The number of participants with dietary information was obtained by applying all exclusion criteria used in the main analyses (i.e., number corresponds to participants eventually included in the study);

The number of participants with missing dietary information was obtained after applying all exclusion criteria used in the main analyses

**Table S2:** Description of food items included in the 23 food categories used to identify dietary patterns

| Food categories     | Included food items                                                                                                                                                                                                          |
|---------------------|------------------------------------------------------------------------------------------------------------------------------------------------------------------------------------------------------------------------------|
| Vegetables          | Leafy, fruiting, root, cruciferous, cabbages, mushrooms, onions, garlic, stalk vegetables, sprouts, mixed salads and vegetables, legumes (peas, chickpeas, lentils, beans)<br>Except: vegetable juices, olives, soy products |
| Fruits              | Fresh fruits, dried fruits, stewed fruits, mixed fruits, olives<br>Except: fruit juices                                                                                                                                      |
| Nuts                | Nuts (including nut spreads), seeds                                                                                                                                                                                          |
| Dairy products      | Milk, milk beverages, cream desserts, puddings (milk-based), cream, milk for coffee and creamers                                                                                                                             |
| Yogurt              | Nature yogurt, fruit yogurt, kefir                                                                                                                                                                                           |
| Cheese              | Hard cheese, fresh cheese, soft cheese, cottage cheese, quark, mozzarella, feta cheese                                                                                                                                       |
| Whole grains        | Whole-grain bread, whole-grain toast, muesli                                                                                                                                                                                 |
| Refined grains      | Flour, flakes, starches, semolina, pasta, rice, other grains, refined bread, crisp bread, rusks, breakfast cereals, salty biscuits, aperitif biscuits, crackers, dough and pastry (puff, shortcrust, pizza)                  |
| Starchy             | Potatoes, potato products                                                                                                                                                                                                    |
| Red meat            | Fresh meat and offal (beef, veal, pork, lamb/mutton, horse, goat), game                                                                                                                                                      |
| Processed meat      | Sausages, smoked and cured meat, meat spreads; from red or white meat                                                                                                                                                        |
| White meat          | Poultry                                                                                                                                                                                                                      |
| Fish                | Fish, fish products, crustaceans, molluscs                                                                                                                                                                                   |
| Eggs                | Eggs, egg products                                                                                                                                                                                                           |
| Added fats          | Vegetable oils, butter, margarines, baking and deep frying fats                                                                                                                                                              |
| Sugars & chocolate  | Sugar, jam, marmalade, honey, syrup, chocolate and chocolate products, candy bars, paste, confetti, flocks, non-chocolate confectionery, nougat, cereal bars, ice cream, sorbet                                              |
| Cakes               | Cakes, pies, pastries, waffles, dry cakes, biscuits                                                                                                                                                                          |
| SSB                 | Carbonated/soft/isotonic drinks, diluted syrups, fruit and vegetable juices, nectars                                                                                                                                         |
| Coffee              | Coffee                                                                                                                                                                                                                       |
| Alcoholic beverages | Beer, cider, wine, spirits, brandy, liqueurs, cocktails, punches                                                                                                                                                             |
| Sauces & seasoning  | Tomato sauces, dressing sauces, mayonnaises and similar, condiments                                                                                                                                                          |
| Soups               | Soups, bouillon                                                                                                                                                                                                              |
| Others              | Other unclassified products, soy products                                                                                                                                                                                    |

SSB: sugar-sweetened beverages

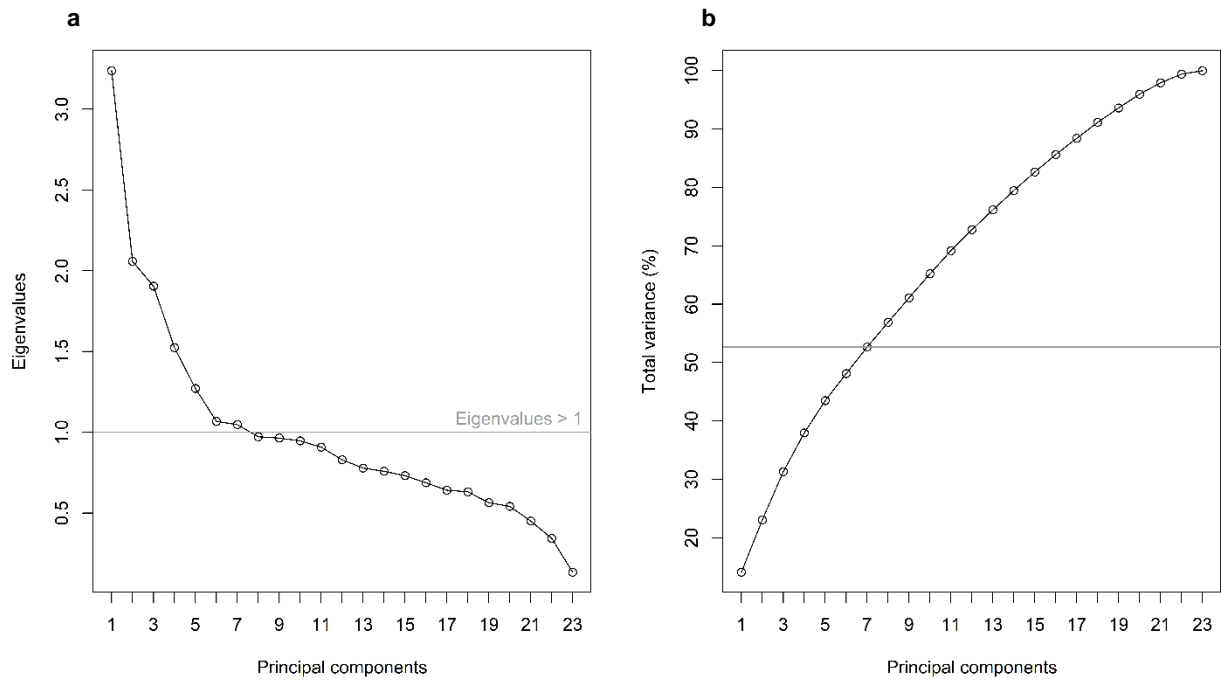

**Fig. S1:** Criteria used to determine the number of principal components to retain in principal component analysis. (a) Scree-plot, (b) Cumulative variance

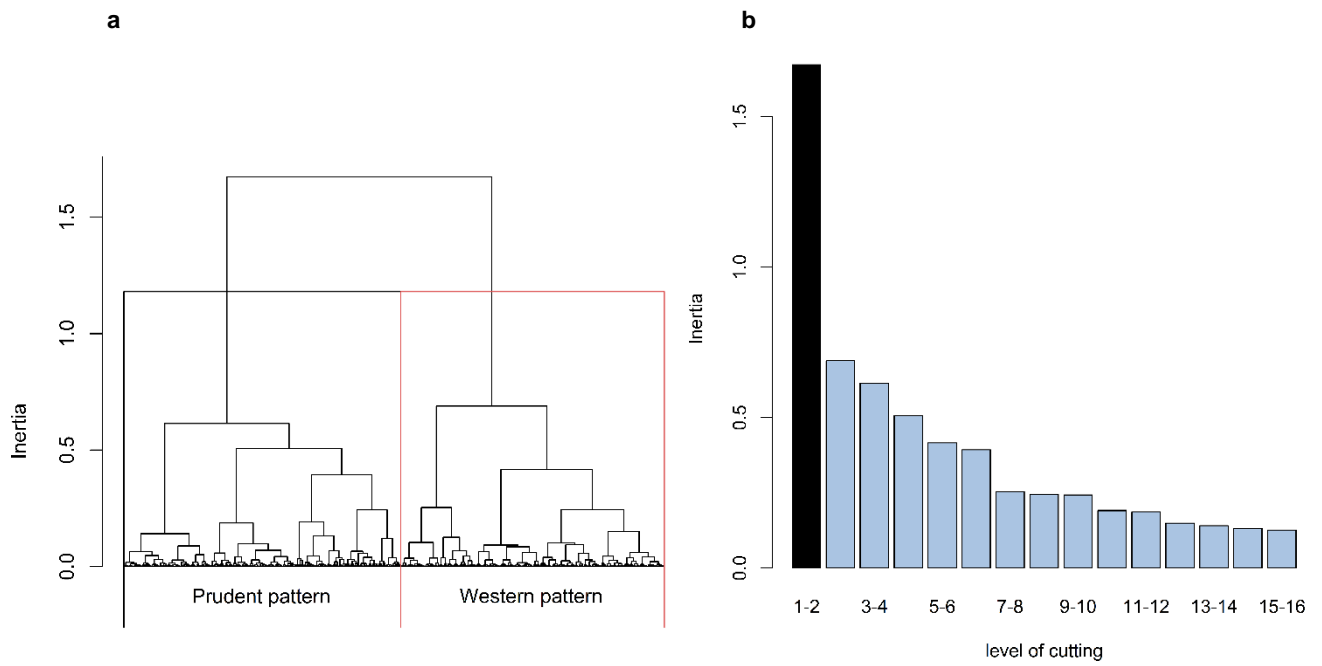

**Fig. S2:** Changes in inter-cluster inertia in hierarchical clustering. (a) Cluster dendrogram by hierarchical clustering on the seven principal components obtained after principal component analysis, (b) Changes in inter-cluster inertia between partitions containing n or n+1 clusters
